# Supplementary material for: Adult bone marrow progenitors become decidual cells and contribute to embryo implantation and pregnancy
Source: PubMed Central journal article supplement (PMC6742226; doi:10.1371/journal.pbio.3000421), 2019-09-12

S12\_Fig. Ingenuity Pathway Analysis (IPA) showing significantly enriched pathways of the genes commonly differentially expressed in the comparisons of *Hoxa11*<sup>+/-</sup>-*KO* BMT vs. *Hoxa11*<sup>+/-</sup>-*WT* BMT, and *Hoxa11*<sup>+/-</sup>-*KO* BMT vs. *WT*<sup>WT</sup> BMT.

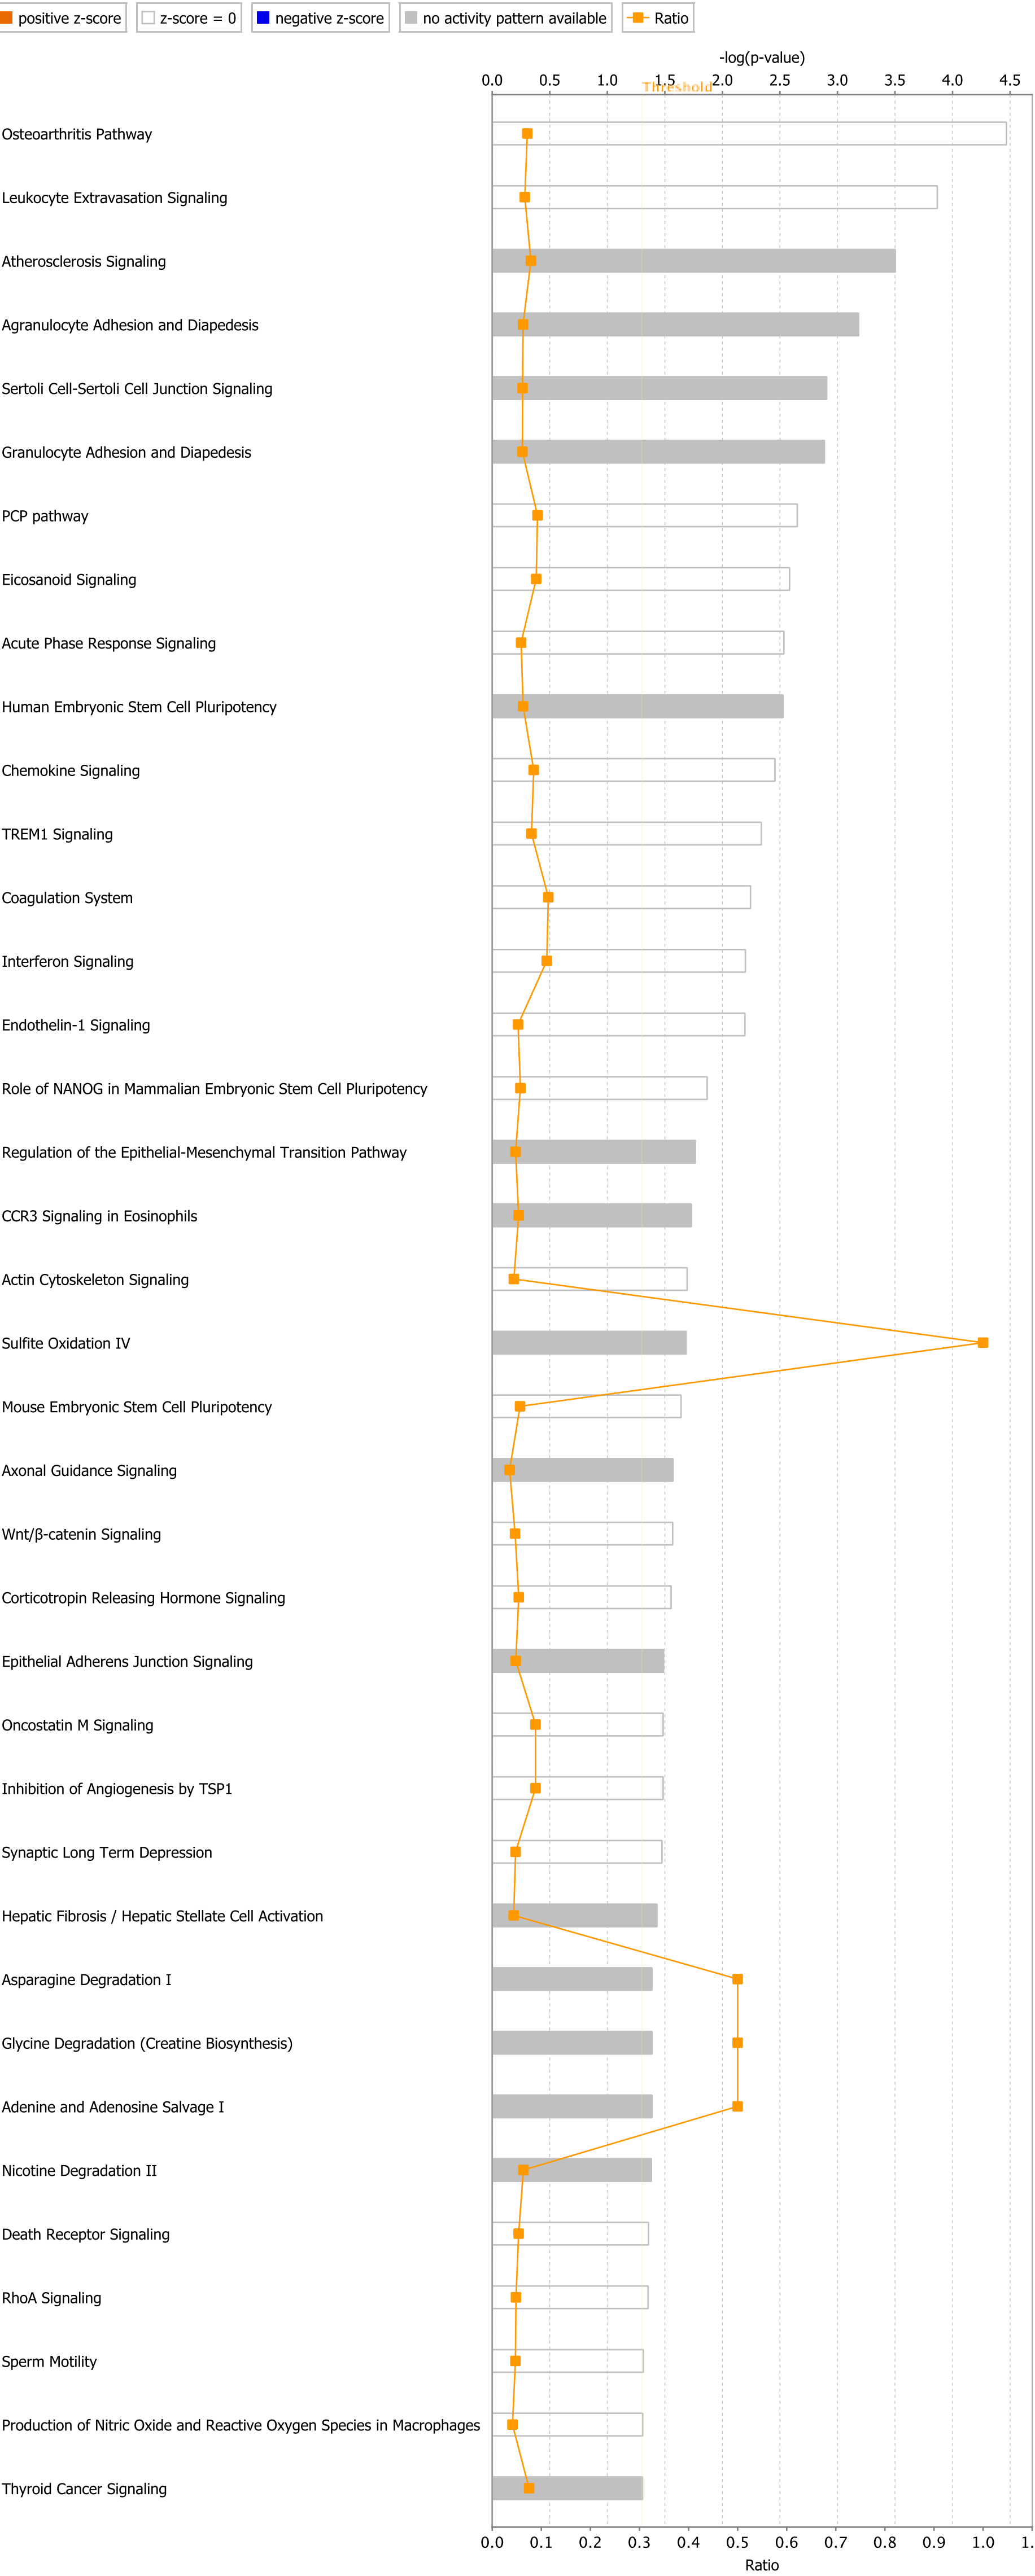

Supplement: pbio.3000421.s012.pdf [file pbio.3000421.s012.pdf]
