# Supplementary material for: Adult bone marrow progenitors become decidual cells and contribute to embryo implantation and pregnancy
Source: PLoS Biol. 2019 Sep 12;17(9):e3000421. doi: 10.1371/journal.pbio.3000421 (PMC6742226; doi:10.1371/journal.pbio.3000421)
Supplement: S2 Data — KO, knockout; WT, wild-type. (XLSX) [file pbio.3000421.s020.xlsx]

## Sheet: Sheet1
498 genes commonly differentially expressed (p<0.05) in E5.5 implantation sites between the comparisons of hetero_KO vs. WT_WT and hetero_KO vs. hetero_WT
Gene Symbol	Description	Log2 fold change Hetero_KO_vs_WT_WT	Log2 fold change Hetero_KO_vs_Hetero_WT	Same Direction
Clca1	chloride channel accessory 1	2.67825	2.08618	YES
Sdr16c6	short chain dehydrogenase/reductase family 16C, member 6	2.61354	2.04005	YES
Cyp1a1	cytochrome P450, family 1, subfamily a, polypeptide 1	2.43562	2.06553	YES
Sectm1b	secreted and transmembrane 1B	2.38306	1.41744	YES
Bpifb5	BPI fold containing family B, member 5	2.22233	1.87972	YES
Dleu7	deleted in lymphocytic leukemia, 7	2.14755	2.07153	YES
Cxcl9	chemokine (C-X-C motif) ligand 9	2.12847	2.01494	YES
Tmprss11g	transmembrane protease, serine 11g	1.77664	1.00373	YES
Car12	carbonic anhydrase 12	1.66254	0.814002	YES
Serpinb11	serine (or cysteine) peptidase inhibitor, clade B (ovalbumin), member 11	1.5597	1.33331	YES
Klra5	killer cell lectin-like receptor, subfamily A, member 5	1.53919	1.27651	YES
Sox9	SRY (sex determining region Y)-box 9	1.53603	0.773605	YES
Clca2	chloride channel accessory 2	1.52997	0.763778	YES
Foxa2	forkhead box A2	1.43111	1.08314	YES
Dmrta1	doublesex and mab-3 related transcription factor like family A1	1.38328	1.18731	YES
Amdhd1	amidohydrolase domain containing 1	1.34972	1.21465	YES
Gapt	Grb2-binding adaptor, transmembrane	1.32087	0.856355	YES
Pof1b	premature ovarian failure 1B	1.28124	0.695706	YES
Npy	neuropeptide Y	1.27676	-0.764638	NO
Edn3	endothelin 3	1.26229	0.824677	YES
Krt12	keratin 12	1.24743	1.36145	YES
Slc13a5	solute carrier family 13 (sodium-dependent citrate transporter), member 5	1.23062	2.50147	YES
Alox12e	arachidonate lipoxygenase, epidermal	1.21725	1.09015	YES
Pla2g7	phospholipase A2, group VII (platelet-activating factor acetylhydrolase, plasma)	1.21455	0.794701	YES
Ifit1bl1	interferon induced protein with tetratricpeptide repeats 1B like 1	1.18599	1.18901	YES
Alox15	arachidonate 15-lipoxygenase	1.18528	1.21585	YES
Sult1d1	sulfotransferase family 1D, member 1	1.18018	1.14915	YES
Ifit1	interferon-induced protein with tetratricopeptide repeats 1	1.17527	1.50374	YES
Cers3	ceramide synthase 3	1.17442	1.49495	YES
Prom1	prominin 1	1.16391	0.640061	YES
Iigp1	interferon inducible GTPase 1	1.15947	1.20582	YES
Gbp10	guanylate-binding protein 10	1.1542	1.14795	YES
Tmeff2	transmembrane protein with EGF-like and two follistatin-like domains 2	1.15232	1.19363	YES
Mecom	MDS1 and EVI1 complex locus	1.13593	1.19948	YES
Ccr3	chemokine (C-C motif) receptor 3	1.13343	1.03146	YES
Gbp6	guanylate binding protein 6	1.1329	1.22928	YES
Dock2	dedicator of cyto-kinesis 2	1.13094	1.0311	YES
Syn2	synapsin II	1.12868	0.939097	YES
Gca	grancalcin	1.12277	0.804686	YES
Naip1	NLR family, apoptosis inhibitory protein 1	1.11803	1.47949	YES
BC064078	cDNA sequence BC064078	1.09275	1.16692	YES
Nov	nephroblastoma overexpressed gene	1.09146	0.644504	YES
Fxyd3	FXYD domain-containing ion transport regulator 3	1.0815	0.691759	YES
Akr1c19	aldo-keto reductase family 1, member C19	1.07675	1.16503	YES
Sprr2g	small proline-rich protein 2G	1.06667	1.38935	YES
Tgtp2	T cell specific GTPase 2	1.06572	1.02613	YES
Ptprz1	protein tyrosine phosphatase, receptor type Z, polypeptide 1	1.06133	0.810796	YES
Gap43	growth associated protein 43	1.05103	0.917713	YES
F830016B08Rik	RIKEN cDNA F830016B08 gene	1.04601	1.10368	YES
Cd36	CD36 antigen	1.04498	0.888901	YES
Naip6	NLR family, apoptosis inhibitory protein 6	1.0421	1.3654	YES
Tex15	testis expressed gene 15	1.03159	0.719169	YES
Lin7a	lin-7 homolog A (C. elegans)	1.0295	0.950603	YES
Tc2n	tandem C2 domains, nuclear	1.02794	1.03813	YES
4930447C04Rik	RIKEN cDNA 4930447C04 gene	1.02235	0.956415	YES
Hp	haptoglobin	1.01971	0.500618	YES
Hrk	harakiri, BCL2 interacting protein (contains only BH3 domain)	1.0183	1.01187	YES
Tmem56	transmembrane protein 56	1.01633	1.03013	YES
Cfi	complement component factor i	1.01385	1.11436	YES
Cd83	CD83 antigen	1.01354	0.881265	YES
B2m	beta-2 microglobulin	0.996482	0.934316	YES
Jchain	immunoglobulin joining chain	0.990331	3.04607	YES
Lamc3	laminin gamma 3	0.989568	0.912898	YES
Cpne5	copine V	0.983927	1.15601	YES
Ccl28	chemokine (C-C motif) ligand 28	0.977968	0.944432	YES
Ggt6	gamma-glutamyltransferase 6	0.974346	1.13307	YES
March1	membrane-associated ring finger (C3HC4) 1	0.959902	0.921928	YES
Tm4sf4	transmembrane 4 superfamily member 4	0.953823	0.950968	YES
Gadd45a	growth arrest and DNA-damage-inducible 45 alpha	0.95236	0.623683	YES
Slc5a11	solute carrier family 5 (sodium/glucose cotransporter), member 11	0.94703	0.690571	YES
Atp6v0d2	ATPase, H+ transporting, lysosomal V0 subunit D2	0.942033	0.457824	YES
Tlr8	toll-like receptor 8	0.940437	1.00227	YES
Zfp457	zinc finger protein 457	0.929034	0.772457	YES
Oit1	oncoprotein induced transcript 1	0.922384	0.712403	YES
Ccdc85a	coiled-coil domain containing 85A	0.911509	0.826067	YES
Ptger2	prostaglandin E receptor 2 (subtype EP2)	0.903225	0.540704	YES
Retnlg	resistin like gamma	0.902439	0.870585	YES
Cobl	cordon-bleu WH2 repeat	0.894241	0.912094	YES
Msx1os	msh homeobox 1 opposite strand	0.891405	1.41153	YES
Tgtp1	T cell specific GTPase 1	0.890172	0.823108	YES
Rasef	RAS and EF hand domain containing	0.88395	0.812559	YES
Sv2b	synaptic vesicle glycoprotein 2 b	0.874639	0.753254	YES
Ildr1	immunoglobulin-like domain containing receptor 1	0.870142	0.784037	YES
Cysltr1	cysteinyl leukotriene receptor 1	0.865162	0.901608	YES
Acod1	aconitate decarboxylase 1	0.858598	0.723826	YES
Ddx60	DEAD (Asp-Glu-Ala-Asp) box polypeptide 60	0.854895	1.22807	YES
Fap	fibroblast activation protein	0.8521	0.817334	YES
Gbp5	guanylate binding protein 5	0.845153	0.948768	YES
Trim30d	tripartite motif-containing 30D	0.843682	0.665584	YES
Gm4951	predicted gene 4951	0.843207	1.05254	YES
Gm12250	predicted gene 12250	0.840279	0.805241	YES
Ptprd	protein tyrosine phosphatase, receptor type, D	0.838266	1.06284	YES
Slc1a1	solute carrier family 1 (neuronal/epithelial high affinity glutamate transporter, system Xag), member 1	0.837011	0.886743	YES
Cldn23	claudin 23	0.828473	0.773227	YES
Fgl2	fibrinogen-like protein 2	0.82111	0.892419	YES
Hmga2	high mobility group AT-hook 2	0.816789	0.853569	YES
Gm4070	predicted gene 4070	0.814628	0.566158	YES
Ocln	occludin	0.807007	0.774191	YES
Hhex	hematopoietically expressed homeobox	0.804529	0.725835	YES
Cybb	cytochrome b-245, beta polypeptide	0.804388	0.829667	YES
Gbp7	guanylate binding protein 7	0.80034	0.947834	YES
Clec12a	C-type lectin domain family 12, member a	0.799673	0.903444	YES
Gbp4	guanylate binding protein 4	0.792829	0.696363	YES
Inmt	indolethylamine N-methyltransferase	0.789621	0.602031	YES
Ms4a4b	membrane-spanning 4-domains, subfamily A, member 4B	0.78701	0.854814	YES
Arhgap15	Rho GTPase activating protein 15	0.785894	1.05783	YES
Negr1	neuronal growth regulator 1	0.785772	1.11445	YES
Kcnd2	potassium voltage-gated channel, Shal-related family, member 2	0.784532	1.19304	YES
Gpcpd1	glycerophosphocholine phosphodiesterase 1	0.781529	0.664734	YES
9330159F19Rik	RIKEN cDNA 9330159F19 gene	0.780089	0.682452	YES
Klrk1	killer cell lectin-like receptor subfamily K, member 1	0.778216	1.02185	YES
Ncald	neurocalcin delta	0.773081	0.651688	YES
Macc1	metastasis associated in colon cancer 1	0.772704	1.10516	YES
Zfp455	zinc finger protein 455	0.764859	0.850782	YES
Gm13251	predicted gene 13251	0.764027	0.795283	YES
Tifa	TRAF-interacting protein with forkhead-associated domain	0.75951	0.797542	YES
Rtp4	receptor transporter protein 4	0.7555	0.887644	YES
Sel1l3	sel-1 suppressor of lin-12-like 3 (C. elegans)	0.755213	0.548113	YES
Zfp182	zinc finger protein 182	0.750815	0.779524	YES
Acpp	acid phosphatase, prostate	0.749508	0.514808	YES
Cldn1	claudin 1	0.748438	0.72491	YES
Clca1	chloride channel accessory 1	0.747742	0.539884	YES
P2ry10	purinergic receptor P2Y, G-protein coupled 10	0.747312	0.920551	YES
Wdr72	WD repeat domain 72	0.746316	0.740531	YES
Jazf1	JAZF zinc finger 1	0.742852	0.418289	YES
Kctd1	potassium channel tetramerisation domain containing 1	0.738905	0.785663	YES
Cntn1	contactin 1	0.738316	0.610086	YES
Il2ra	interleukin 2 receptor, alpha chain	0.735274	0.747846	YES
Gm9320	predicted gene 9320	0.732204	0.629843	YES
Myo5c	myosin VC	0.726868	0.973265	YES
Micu3	mitochondrial calcium uptake family, member 3	0.726092	0.673971	YES
Fam46a	family with sequence similarity 46, member A	0.725587	0.41794	YES
Gm17066	predicted gene 17066	0.724449	0.692228	YES
Ap3b2	adaptor-related protein complex 3, beta 2 subunit	0.72432	1.08666	YES
Gm14327	predicted gene 14327	0.719604	0.731283	YES
2610305D13Rik	RIKEN cDNA 2610305D13 gene	0.719027	0.69843	YES
Ifi44	interferon-induced protein 44	0.714451	0.952299	YES
Zfp811	zinc finger protein 811	0.708345	1.00789	YES
Emb	embigin	0.704012	0.524717	YES
Slc16a9	solute carrier family 16 (monocarboxylic acid transporters), member 9	0.702555	0.581869	YES
Hebp2	heme binding protein 2	0.702351	0.809735	YES
Jrkl	Jrk-like	0.701576	0.710116	YES
Gramd1c	GRAM domain containing 1C	0.699846	0.836164	YES
Gbp2	guanylate binding protein 2	0.698565	0.744935	YES
Ap1s3	adaptor-related protein complex AP-1, sigma 3	0.695529	0.767154	YES
Gbp9	guanylate-binding protein 9	0.693588	0.676807	YES
Cytip	cytohesin 1 interacting protein	0.692734	0.760664	YES
Abi3bp	ABI gene family, member 3 (NESH) binding protein	0.691803	1.00062	YES
Pcp4l1	Purkinje cell protein 4-like 1	0.690807	0.545547	YES
Cadm1	cell adhesion molecule 1	0.69054	0.589675	YES
Tspan13	tetraspanin 13	0.687607	0.446385	YES
Tll1	tolloid-like	0.685861	0.562304	YES
Gpm6a	glycoprotein m6a	0.684512	1.06421	YES
Dlx5	distal-less homeobox 5	0.684235	0.600283	YES
Ifi203	interferon activated gene 203	0.682762	0.884084	YES
Ccr2	chemokine (C-C motif) receptor 2	0.682737	0.943175	YES
Apod	apolipoprotein D	0.682666	0.873796	YES
Snhg14	small nucleolar RNA host gene 14	0.680751	0.703122	YES
Ccl11	chemokine (C-C motif) ligand 11	0.677573	0.971687	YES
Zfp945	zinc finger protein 945	0.676722	0.677115	YES
Cd53	CD53 antigen	0.675994	0.725093	YES
Oas2	2'-5' oligoadenylate synthetase 2	0.674277	0.927389	YES
Cd44	CD44 antigen	0.670056	0.554121	YES
Cd24a	CD24a antigen	0.669467	0.6838	YES
Fam65b	family with sequence similarity 65, member B	0.664537	0.748114	YES
Trim30a	tripartite motif-containing 30A	0.661547	0.795588	YES
Gm6300	predicted gene 6300	0.660492	0.747663	YES
Snai2	snail family zinc finger 2	0.659129	0.480009	YES
Itpr2	inositol 1,4,5-triphosphate receptor 2	0.656383	0.858758	YES
Slc4a7	solute carrier family 4, sodium bicarbonate cotransporter, member 7	0.65578	0.505418	YES
Igtp	interferon gamma induced GTPase	0.655689	0.761407	YES
Zfp654	zinc finger protein 654	0.649166	0.601176	YES
Gbp3	guanylate binding protein 3	0.646996	0.860525	YES
Esrp1	epithelial splicing regulatory protein 1	0.643917	0.521277	YES
Palmd	palmdelphin	0.641415	0.57891	YES
Ehf	ets homologous factor	0.640267	0.758998	YES
Tfcp2l1	transcription factor CP2-like 1	0.638692	0.618637	YES
Cwh43	cell wall biogenesis 43 C-terminal homolog	0.637958	0.589231	YES
Epsti1	epithelial stromal interaction 1 (breast)	0.637724	0.66311	YES
Fcgbp	Fc fragment of IgG binding protein	0.636498	0.6604	YES
Casp12	caspase 12	0.633915	0.763799	YES
Scn2a1	sodium channel, voltage-gated, type II, alpha 1	0.633046	0.734573	YES
Nlrc5	NLR family, CARD domain containing 5	0.631969	0.506675	YES
Marveld2	MARVEL (membrane-associating) domain containing 2	0.630856	0.64143	YES
Ccl9	chemokine (C-C motif) ligand 9	0.629185	0.621722	YES
Tmprss2	transmembrane protease, serine 2	0.623695	0.502725	YES
Samd9l	sterile alpha motif domain containing 9-like	0.620605	0.697796	YES
Myo5b	myosin VB	0.620219	0.685453	YES
Ankrd29	ankyrin repeat domain 29	0.617635	0.896359	YES
Tppp	tubulin polymerization promoting protein	0.617466	0.78909	YES
Pcp4	Purkinje cell protein 4	0.617357	0.690142	YES
Herc6	hect domain and RLD 6	0.617017	0.719009	YES
Zfp758	zinc finger protein 758	0.61315	0.6228	YES
Cyp1b1	cytochrome P450, family 1, subfamily b, polypeptide 1	0.612704	0.716713	YES
Ms4a6b	membrane-spanning 4-domains, subfamily A, member 6B	0.611385	0.784491	YES
Slc8a1	solute carrier family 8 (sodium/calcium exchanger), member 1	0.603886	0.483073	YES
Nova1	neuro-oncological ventral antigen 1	0.603517	0.69402	YES
Cd84	CD84 antigen	0.599468	0.709725	YES
Ttc14	tetratricopeptide repeat domain 14	0.599389	0.57873	YES
Dgkk	diacylglycerol kinase kappa	0.59773	-1.36227	NO
Oasl2	2'-5' oligoadenylate synthetase-like 2	0.597591	0.940136	YES
Dcn	decorin	0.596628	0.805301	YES
Lrch2	leucine-rich repeats and calponin homology (CH) domain containing 2	0.596627	0.602296	YES
Ccl6	chemokine (C-C motif) ligand 6	0.595744	0.506091	YES
Ifit3b	interferon-induced protein with tetratricopeptide repeats 3B	0.595031	0.693269	YES
Tpd52	tumor protein D52	0.590841	0.522345	YES
Hook1	hook microtubule tethering protein 1	0.590314	0.674487	YES
Cep83os	centrosomal protein 83, opposite strand	0.590135	0.528861	YES
Cd52	CD52 antigen	0.589771	0.553473	YES
Fam134b	family with sequence similarity 134, member B	0.589022	0.457366	YES
AW112010	expressed sequence AW112010	0.588915	0.745826	YES
Cap2	CAP, adenylate cyclase-associated protein, 2 (yeast)	0.5869	0.62677	YES
Nfib	nuclear factor I/B	0.586171	0.681576	YES
Dsg2	desmoglein 2	0.58614	0.62	YES
Bche	butyrylcholinesterase	0.585208	0.904241	YES
Ogn	osteoglycin	0.582193	0.79829	YES
Atp2b2	ATPase, Ca++ transporting, plasma membrane 2	0.581105	1.16708	YES
Synpo2	synaptopodin 2	0.576101	0.504219	YES
Hgf	hepatocyte growth factor	0.574682	0.531632	YES
Clec2d	C-type lectin domain family 2, member d	0.574255	0.498491	YES
Zfp800	zinc finger protein 800	0.570179	0.606283	YES
Prelp	proline arginine-rich end leucine-rich repeat	0.570154	0.424286	YES
Kcnt2	potassium channel, subfamily T, member 2	0.569227	0.672511	YES
Casp1	caspase 1	0.568281	0.799289	YES
Enpep	glutamyl aminopeptidase	0.566768	0.651471	YES
Nexn	nexilin	0.566127	0.71403	YES
Ppm1e	protein phosphatase 1E (PP2C domain containing)	0.566052	0.669285	YES
Casp4	caspase 4, apoptosis-related cysteine peptidase	0.565855	0.848964	YES
Prss23	protease, serine 23	0.564482	0.482115	YES
Ncoa7	nuclear receptor coactivator 7	0.561653	0.627918	YES
Vav3	vav 3 oncogene	0.561147	0.593015	YES
Kif5c	kinesin family member 5C	0.560842	0.631214	YES
Nedd4l	neural precursor cell expressed, developmentally down-regulated gene 4-like	0.559132	0.464774	YES
Arrdc3	arrestin domain containing 3	0.555737	0.653437	YES
Rbm24	RNA binding motif protein 24	0.5535	0.793594	YES
Gimap8	GTPase, IMAP family member 8	0.553475	0.513776	YES
Smim10l1	small integral membrane protein 10 like 1	0.551281	0.668958	YES
B4galt6	UDP-Gal:betaGlcNAc beta 1,4-galactosyltransferase, polypeptide 6	0.551253	0.462749	YES
Gucy1a2	guanylate cyclase 1, soluble, alpha 2	0.55011	0.589643	YES
Slc25a36	solute carrier family 25, member 36	0.545448	0.552821	YES
Olfr613	olfactory receptor 613	0.545447	0.604094	YES
2010315B03Rik	RIKEN cDNA 2010315B03 gene	0.544429	0.696388	YES
Pla2g16	phospholipase A2, group XVI	0.541211	0.685283	YES
Rspo3	R-spondin 3	0.541108	0.827026	YES
Sp100	nuclear antigen Sp100	0.541075	0.892367	YES
Bcap29	B cell receptor associated protein 29	0.538163	0.540943	YES
Phf11d	PHD finger protein 11D	0.535816	0.781328	YES
Zfp280c	zinc finger protein 280C	0.535659	0.490119	YES
Abcb1a	ATP-binding cassette, sub-family B (MDR/TAP), member 1A	0.535144	0.564384	YES
Acta1	actin, alpha 1, skeletal muscle	0.53418	-0.470935	NO
Mbnl1	muscleblind-like 1 (Drosophila)	0.533146	0.503108	YES
Dram2	DNA-damage regulated autophagy modulator 2	0.532502	0.50759	YES
Fbxl3	F-box and leucine-rich repeat protein 3	0.531495	0.616787	YES
Mfsd6	major facilitator superfamily domain containing 6	0.53056	0.776258	YES
Ptprc	protein tyrosine phosphatase, receptor type, C	0.528892	0.658309	YES
Sh3bgrl	SH3-binding domain glutamic acid-rich protein like	0.528706	0.532911	YES
Gabra3	gamma-aminobutyric acid (GABA) A receptor, subunit alpha 3	0.52838	0.641101	YES
Exoc6	exocyst complex component 6	0.527549	0.555583	YES
Slmap	sarcolemma associated protein	0.527121	0.530913	YES
Dapp1	dual adaptor for phosphotyrosine and 3-phosphoinositides 1	0.526598	0.630638	YES
Naaa	N-acylethanolamine acid amidase	0.524518	0.555607	YES
Rev3l	REV3 like, DNA directed polymerase zeta catalytic subunit	0.523291	0.560363	YES
Sema3c	sema domain, immunoglobulin domain (Ig), short basic domain, secreted, (semaphorin) 3C	0.523031	0.507846	YES
Pdp1	pyruvate dehyrogenase phosphatase catalytic subunit 1	0.518932	0.590561	YES
Spon1	spondin 1, (f-spondin) extracellular matrix protein	0.518597	0.512811	YES
Rnpc3	RNA-binding region (RNP1, RRM) containing 3	0.518119	0.629583	YES
Ifit3	interferon-induced protein with tetratricopeptide repeats 3	0.517767	0.622287	YES
Gulp1	GULP, engulfment adaptor PTB domain containing 1	0.516664	0.638574	YES
Scai	suppressor of cancer cell invasion	0.516347	0.513177	YES
Fsd1l	fibronectin type III and SPRY domain containing 1-like	0.514683	0.698546	YES
Rp2	retinitis pigmentosa 2 homolog	0.511958	0.42672	YES
Tmem132c	transmembrane protein 132C	0.511236	0.768322	YES
Arsk	arylsulfatase K	0.511177	0.588659	YES
Plekhs1	pleckstrin homology domain containing, family S member 1	0.510429	1.73338	YES
Malat1	metastasis associated lung adenocarcinoma transcript 1 (non-coding RNA)	0.509235	0.547231	YES
AI987944	expressed sequence AI987944	0.506648	0.572245	YES
Zfp738	zinc finger protein 738	0.506601	0.486494	YES
Plek	pleckstrin	0.506577	0.576933	YES
Shtn1	shootin 1	0.506436	0.492178	YES
A830080D01Rik	RIKEN cDNA A830080D01 gene	0.505049	0.460741	YES
Iqgap2	IQ motif containing GTPase activating protein 2	0.504552	0.542767	YES
Jam2	junction adhesion molecule 2	0.504268	0.679573	YES
Satb1	special AT-rich sequence binding protein 1	0.503869	0.59882	YES
Gpm6b	glycoprotein m6b	0.502633	0.702316	YES
Gm4944	predicted gene 4944	0.501716	0.496847	YES
Ccdc186	coiled-coil domain containing 186	0.501548	0.46038	YES
Rassf5	Ras association (RalGDS/AF-6) domain family member 5	0.501181	0.505945	YES
Sox17	SRY (sex determining region Y)-box 17	0.500953	0.670345	YES
Lyz2	lysozyme 2	0.499887	0.443517	YES
Kras	Kirsten rat sarcoma viral oncogene homolog	0.499768	0.467784	YES
Ifih1	interferon induced with helicase C domain 1	0.498902	0.799367	YES
Rsad2	radical S-adenosyl methionine domain containing 2	0.498224	0.765496	YES
Cp	ceruloplasmin	0.49648	0.480001	YES
Enpp3	ectonucleotide pyrophosphatase/phosphodiesterase 3	0.495575	0.540464	YES
Pdk4	pyruvate dehydrogenase kinase, isoenzyme 4	0.494736	0.560215	YES
Cd200	CD200 antigen	0.494485	0.476164	YES
Ube2w	ubiquitin-conjugating enzyme E2W (putative)	0.493047	0.451905	YES
Prkaa1	protein kinase, AMP-activated, alpha 1 catalytic subunit	0.492654	0.417157	YES
Lepr	leptin receptor	0.491902	0.639554	YES
Lztfl1	leucine zipper transcription factor-like 1	0.490657	0.554749	YES
Il13ra1	interleukin 13 receptor, alpha 1	0.490475	0.502464	YES
Ppig	peptidyl-prolyl isomerase G (cyclophilin G)	0.489616	0.502562	YES
Efemp1	epidermal growth factor-containing fibulin-like extracellular matrix protein 1	0.488883	0.650092	YES
Klhl4	kelch-like 4	0.48873	0.547391	YES
Pkia	protein kinase inhibitor, alpha	0.486704	0.608414	YES
Zfp329	zinc finger protein 329	0.486571	0.508637	YES
Zfp386	zinc finger protein 386 (Kruppel-like)	0.485923	0.533298	YES
Irgm2	immunity-related GTPase family M member 2	0.483108	0.710957	YES
Foxp1	forkhead box P1	0.48173	0.400033	YES
Gucy1a3	guanylate cyclase 1, soluble, alpha 3	0.481307	0.479594	YES
Ank3	ankyrin 3, epithelial	0.480956	0.569318	YES
Snrnp27	small nuclear ribonucleoprotein 27 (U4/U6.U5)	0.480953	0.439153	YES
B630005N14Rik	RIKEN cDNA B630005N14 gene	0.480318	0.556498	YES
Cd2ap	CD2-associated protein	0.479797	0.421699	YES
Lyz1	lysozyme 1	0.475858	0.473166	YES
Fam208a	family with sequence similarity 208, member A	0.474701	0.527515	YES
Pcmtd2	protein-L-isoaspartate (D-aspartate) O-methyltransferase domain containing 2	0.473981	0.486743	YES
Zfp874b	zinc finger protein 874b	0.473771	0.656977	YES
Fnip1	folliculin interacting protein 1	0.47312	0.562168	YES
Vwf	Von Willebrand factor	0.472245	0.446756	YES
Fam198b	family with sequence similarity 198, member B	0.471483	0.434357	YES
Fzd6	frizzled class receptor 6	0.471434	0.66461	YES
Kdm7a	lysine (K)-specific demethylase 7A	0.471358	0.620927	YES
Snx13	sorting nexin 13	0.471078	0.419983	YES
Dsp	desmoplakin	0.470405	0.724337	YES
Zfp715	zinc finger protein 715	0.470369	0.441466	YES
Cops2	COP9 signalosome subunit 2	0.469186	0.606423	YES
Fam3c	family with sequence similarity 3, member C	0.469186	0.515444	YES
Rnf128	ring finger protein 128	0.467969	0.805742	YES
Gm17821	predicted gene, 17821	0.466855	0.682615	YES
Arhgap5	Rho GTPase activating protein 5	0.464965	0.472225	YES
Tnfsf10	tumor necrosis factor (ligand) superfamily, member 10	0.46445	0.460934	YES
Ccr5	chemokine (C-C motif) receptor 5	0.462988	0.517862	YES
Ivns1abp	influenza virus NS1A binding protein	0.462567	0.435304	YES
Itm2b	integral membrane protein 2B	0.462371	0.522639	YES
Synj2bp	synaptojanin 2 binding protein	0.460702	0.513802	YES
Tial1	Tia1 cytotoxic granule-associated RNA binding protein-like 1	0.460599	0.41626	YES
Plpp3	phospholipid phosphatase 3	0.460525	0.525088	YES
Zfp36l1	zinc finger protein 36, C3H type-like 1	0.459148	0.463418	YES
Crebrf	CREB3 regulatory factor	0.459045	0.64843	YES
Lmod1	leiomodin 1 (smooth muscle)	0.456548	0.49679	YES
Ggta1	glycoprotein galactosyltransferase alpha 1, 3	0.456189	0.535169	YES
Mtus1	mitochondrial tumor suppressor 1	0.455893	0.5012	YES
Ankrd12	ankyrin repeat domain 12	0.45511	0.543212	YES
Sepp1	selenoprotein P, plasma, 1	0.454859	0.538074	YES
Ptbp2	polypyrimidine tract binding protein 2	0.454721	0.430658	YES
Parp14	poly (ADP-ribose) polymerase family, member 14	0.45436	0.522706	YES
Fmo2	flavin containing monooxygenase 2	0.453601	0.6487	YES
Rsrc2	arginine/serine-rich coiled-coil 2	0.452653	0.615023	YES
AW549877	expressed sequence AW549877	0.452186	0.464754	YES
Itga4	integrin alpha 4	0.451884	0.435057	YES
Pcf11	PCF11 cleavage and polyadenylation factor subunit	0.44788	0.45775	YES
Nsa2	NSA2 ribosome biogenesis homolog	0.447149	0.571526	YES
Jak2	Janus kinase 2	0.446589	0.514013	YES
Cav2	caveolin 2	0.445326	0.54449	YES
Sept10	septin 10	0.445254	0.48492	YES
Stat1	signal transducer and activator of transcription 1	0.444612	0.521778	YES
Mrc1	mannose receptor, C type 1	0.443575	0.451078	YES
N4bp2l2	NEDD4 binding protein 2-like 2	0.441197	0.430924	YES
Cacna2d1	calcium channel, voltage-dependent, alpha2/delta subunit 1	0.439335	0.577897	YES
Znrf2	zinc and ring finger 2	0.436001	0.448549	YES
Txndc16	thioredoxin domain containing 16	0.435191	0.570641	YES
Celf2	CUGBP, Elav-like family member 2	0.434139	0.601641	YES
Mpeg1	macrophage expressed gene 1	0.433523	0.612871	YES
Fcho2	FCH domain only 2	0.4331	0.41693	YES
Vbp1	von Hippel-Lindau binding protein 1	0.430312	0.483383	YES
Gcnt2	glucosaminyl (N-acetyl) transferase 2, I-branching enzyme	0.430302	0.600738	YES
Luc7l3	LUC7-like 3 (S. cerevisiae)	0.429774	0.520365	YES
Aftph	aftiphilin	0.427862	0.474944	YES
Ypel2	yippee-like 2 (Drosophila)	0.427179	0.449794	YES
Ak3	adenylate kinase 3	0.424672	0.543111	YES
Wwp1	WW domain containing E3 ubiquitin protein ligase 1	0.423866	0.411289	YES
Ddx26b	DEAD/H (Asp-Glu-Ala-Asp/His) box polypeptide 26B	0.418614	0.422695	YES
Rock1	Rho-associated coiled-coil containing protein kinase 1	0.417807	0.42954	YES
Rap1a	RAS-related protein-1a	0.41715	0.497553	YES
Ezr	ezrin	0.415956	0.485587	YES
Casc4	cancer susceptibility candidate 4	0.414083	0.536391	YES
Tgfbr3	transforming growth factor, beta receptor III	0.413916	0.427727	YES
Dynlt3	dynein light chain Tctex-type 3	0.410813	0.506863	YES
Btg1	B cell translocation gene 1, anti-proliferative	0.40887	0.410252	YES
Sppl2a	signal peptide peptidase like 2A	0.408667	0.418897	YES
Chmp2b	charged multivesicular body protein 2B	0.408361	0.464709	YES
Pcmtd1	protein-L-isoaspartate (D-aspartate) O-methyltransferase domain containing 1	0.4079	0.506292	YES
Ppp1cb	protein phosphatase 1, catalytic subunit, beta isoform	0.407677	0.434473	YES
Tmed5	transmembrane emp24 protein transport domain containing 5	0.40368	0.429658	YES
Fgfr1op2	FGFR1 oncogene partner 2	0.401966	0.500255	YES
Scara5	scavenger receptor class A, member 5	0.400565	0.464137	YES
Akap9	A kinase (PRKA) anchor protein (yotiao) 9	0.398427	0.548815	YES
Gnai1	guanine nucleotide binding protein (G protein), alpha inhibiting 1	0.398333	0.54505	YES
Fbxo32	F-box protein 32	0.395033	0.63348	YES
Smek2	SMEK homolog 2, suppressor of mek1 (Dictyostelium)	0.389776	0.462971	YES
Cox8a	cytochrome c oxidase subunit VIIIa	-0.393606	-0.812477	YES
B4galt5	UDP-Gal:betaGlcNAc beta 1,4-galactosyltransferase, polypeptide 5	-0.413341	-0.532974	YES
Lbp	lipopolysaccharide binding protein	-0.414035	-0.552478	YES
Dact3	dishevelled-binding antagonist of beta-catenin 3	-0.414288	-0.702824	YES
Snai1	snail family zinc finger 1	-0.416983	-0.959547	YES
Padi2	peptidyl arginine deiminase, type II	-0.420349	-0.446262	YES
Pkdcc	protein kinase domain containing, cytoplasmic	-0.422837	-0.907914	YES
Mfap2	microfibrillar-associated protein 2	-0.423607	-0.610244	YES
Wnt6	wingless-type MMTV integration site family, member 6	-0.427151	-1.0752	YES
Ptges	prostaglandin E synthase	-0.42738	-0.725018	YES
Prex2	phosphatidylinositol-3,4,5-trisphosphate-dependent Rac exchange factor 2	-0.444084	-0.571289	YES
Timm13	translocase of inner mitochondrial membrane 13	-0.444404	-0.54638	YES
Chchd2	coiled-coil-helix-coiled-coil-helix domain containing 2	-0.445122	-0.67103	YES
Ppp1r14b	protein phosphatase 1, regulatory (inhibitor) subunit 14B	-0.447918	-0.713454	YES
Aoc1	amine oxidase, copper-containing 1	-0.46107	-0.720516	YES
Hbb-bs	hemoglobin, beta adult s chain	-0.461095	-0.895618	YES
Hcn4	hyperpolarization-activated, cyclic nucleotide-gated K+ 4	-0.473756	-1.29073	YES
Csrnp1	cysteine-serine-rich nuclear protein 1	-0.476951	-0.932138	YES
Tmem45a	transmembrane protein 45a	-0.481324	-0.637656	YES
Suox	sulfite oxidase	-0.48174	-0.713216	YES
Smad7	SMAD family member 7	-0.482338	-0.639961	YES
Cacna1g	calcium channel, voltage-dependent, T type, alpha 1G subunit	-0.483574	-0.490913	YES
Mfsd2a	major facilitator superfamily domain containing 2A	-0.483977	-0.730832	YES
Sbsn	suprabasin	-0.485825	-0.766732	YES
Isyna1	myo-inositol 1-phosphate synthase A1	-0.486612	-0.919838	YES
Tmem14c	transmembrane protein 14C	-0.487723	-0.477732	YES
Gatm	glycine amidinotransferase (L-arginine:glycine amidinotransferase)	-0.498002	-0.665529	YES
Cacng7	calcium channel, voltage-dependent, gamma subunit 7	-0.499185	-0.520092	YES
P4ha2	procollagen-proline, 2-oxoglutarate 4-dioxygenase (proline 4-hydroxylase), alpha II polypeptide	-0.50312	-0.607665	YES
Ehd3	EH-domain containing 3	-0.504768	-0.477881	YES
Slc25a29	solute carrier family 25 (mitochondrial carrier, palmitoylcarnitine transporter), member 29	-0.512186	-0.730073	YES
Serpinb9b	serine (or cysteine) peptidase inhibitor, clade B, member 9b	-0.527724	-0.702318	YES
Gm2a	GM2 ganglioside activator protein	-0.528871	-0.631536	YES
Gzmf	granzyme F	-0.530601	-0.566744	YES
Slc30a2	solute carrier family 30 (zinc transporter), member 2	-0.532975	-0.898195	YES
Uchl1	ubiquitin carboxy-terminal hydrolase L1	-0.53594	-0.709007	YES
Kctd11	potassium channel tetramerisation domain containing 11	-0.537515	-0.817102	YES
Rps19-ps3	ribosomal protein S19, pseudogene 3	-0.545172	-0.754201	YES
Metrn	meteorin, glial cell differentiation regulator	-0.547784	-1.15686	YES
Siva1	SIVA1, apoptosis-inducing factor	-0.548397	-0.798097	YES
Oaz1	ornithine decarboxylase antizyme 1	-0.552542	-0.542343	YES
Sphk1	sphingosine kinase 1	-0.554028	-0.48953	YES
Ung	uracil DNA glycosylase	-0.554121	-0.912271	YES
Wnt4	wingless-type MMTV integration site family, member 4	-0.559618	-0.500564	YES
Adora2b	adenosine A2b receptor	-0.559817	-0.760078	YES
Ptpru	protein tyrosine phosphatase, receptor type, U	-0.562833	-0.61816	YES
Cebpb	CCAAT/enhancer binding protein (C/EBP), beta	-0.566214	-1.04158	YES
Rps21	ribosomal protein S21	-0.573807	-0.510412	YES
Aprt	adenine phosphoribosyl transferase	-0.577271	-0.715172	YES
Fam110a	family with sequence similarity 110, member A	-0.582746	-0.794555	YES
Hic1	hypermethylated in cancer 1	-0.584309	-0.835759	YES
Uqcr10	ubiquinol-cytochrome c reductase, complex III subunit X	-0.586412	-0.562139	YES
Id3	inhibitor of DNA binding 3	-0.591913	-1.02499	YES
Coro2b	coronin, actin binding protein, 2B	-0.596418	-0.640467	YES
Hoxd11	homeobox D11	-0.598152	-0.866349	YES
Hopx	HOP homeobox	-0.61347	-0.60091	YES
Tmem37	transmembrane protein 37	-0.615496	-0.763109	YES
Cxcr2	chemokine (C-X-C motif) receptor 2	-0.617641	-0.707677	YES
C2cd4a	C2 calcium-dependent domain containing 4A	-0.617786	-1.08547	YES
S100a6	S100 calcium binding protein A6 (calcyclin)	-0.620572	-0.742809	YES
Kcna1	potassium voltage-gated channel, shaker-related subfamily, member 1	-0.622657	-0.725888	YES
Klhdc8a	kelch domain containing 8A	-0.626846	-0.947728	YES
Olr1	oxidized low density lipoprotein (lectin-like) receptor 1	-0.627182	-0.948419	YES
Ltf	lactotransferrin	-0.628255	0.569345	NO
Prl3c1	prolactin family 3, subfamily c, member 1	-0.633579	-0.755056	YES
Dusp9	dual specificity phosphatase 9	-0.650165	-0.82847	YES
Frem1	Fras1 related extracellular matrix protein 1	-0.669086	-0.456403	YES
Lrrtm1	leucine rich repeat transmembrane neuronal 1	-0.669619	-0.686636	YES
Tnnc1	troponin C, cardiac/slow skeletal	-0.672735	-0.870277	YES
Slc13a2	solute carrier family 13 (sodium-dependent dicarboxylate transporter), member 2	-0.678441	-0.872967	YES
Mt2	metallothionein 2	-0.679945	-1.0836	YES
Id1	inhibitor of DNA binding 1	-0.680351	-0.788004	YES
Adipoq	adiponectin, C1Q and collagen domain containing	-0.717579	0.982393	NO
Mt3	metallothionein 3	-0.719822	-1.34314	YES
Fabp4	fatty acid binding protein 4, adipocyte	-0.71988	0.766843	NO
Prl8a2	prolactin family 8, subfamily a, member 2	-0.724957	-1.05171	YES
Wnt16	wingless-type MMTV integration site family, member 16	-0.725227	0.57437	NO
Ano4	anoctamin 4	-0.736415	1.05296	NO
Bdnf	brain derived neurotrophic factor	-0.745313	-0.990254	YES
Cadm4	cell adhesion molecule 4	-0.76248	-0.707236	YES
Igfbp2	insulin-like growth factor binding protein 2	-0.76743	-0.909915	YES
Hapln3	hyaluronan and proteoglycan link protein 3	-0.787294	-0.724435	YES
A2m	alpha-2-macroglobulin	-0.787693	-0.961734	YES
Nnat	neuronatin	-0.788838	-0.939418	YES
Itgbl1	integrin, beta-like 1	-0.801375	-0.99979	YES
Plin1	perilipin 1	-0.833817	0.730943	NO
Angpt4	angiopoietin 4	-0.841688	-1.50225	YES
Gipr	gastric inhibitory polypeptide receptor	-0.854785	-1.59957	YES
Gdpd3	glycerophosphodiester phosphodiesterase domain containing 3	-0.915491	-0.842412	YES
Erdr1	erythroid differentiation regulator 1	-0.943344	-1.39992	YES
Crabp1	cellular retinoic acid binding protein I	-0.966457	-0.861629	YES
Serpine1	serine (or cysteine) peptidase inhibitor, clade E, member 1	-1.00044	-0.937915	YES
Kng1	kininogen 1	-1.05175	-0.736532	YES
Nanog	Nanog homeobox	-1.06318	-1.1149	YES
Kng2	kininogen 2	-1.07406	-0.693383	YES
Slit1	slit homolog 1 (Drosophila)	-1.08401	-1.33117	YES
H19	H19, imprinted maternally expressed transcript	-1.14824	-0.471961	YES
Prl6a1	prolactin family 6, subfamily a, member 1	-1.19069	-1.09309	YES
Hapln1	hyaluronan and proteoglycan link protein 1	-1.20136	-0.61746	YES
Crct1	cysteine-rich C-terminal 1	-1.23325	-1.28192	YES
Ntrk1	neurotrophic tyrosine kinase, receptor, type 1	-1.24083	-1.14694	YES
Pappa2	pappalysin 2	-1.26862	-1.14016	YES
Fndc7	fibronectin type III domain containing 7	-1.36263	-0.980388	YES
Aspg	asparaginase	-1.43714	-0.913294	YES
Vstm2l	V-set and transmembrane domain containing 2-like	-1.59763	-1.62513	YES
Prl8a9	prolactin family8, subfamily a, member 9	-1.7881	-1.10394	YES
Hist1h2ak	histone cluster 1, H2ak	-1.87988	-1.55485	YES
